# Supplementary material for: Dissecting the innate immune recognition of morphine and its metabolites by TLR4/MD2: an in silico simulation study
Source: Royal Society of Chemistry journal article supplement (doi:10.1039/d3cp03715k), 2023-01-01
Supplement: d3cp03715k1.pdf [file d3cp03715k1.pdf]

## SI Appendix

### Dissecting the innate immune recognition of morphine and its metabolites by TLR4/MD2: an *in silico* simulation study

Xiaozheng Zhang<sup>#a</sup>, Ran Li<sup>#a</sup>, Haoran Xu<sup>a</sup>, Guicai Wu<sup>a</sup>, Siru Wu<sup>b,c</sup>, Hongshuang Wang<sup>b</sup>,  
Yibo Wang<sup>\*b</sup>, Xiaohui Wang<sup>\*b,c,d</sup>

<sup>a</sup>Key Laboratory of Coal Environmental Pathogenicity and Prevention (Shanxi Medical University), Ministry of Education, China; Shanxi Key Laboratory of Birth Defect and Cell Regeneration, Shanxi Medical University, Taiyuan, Shanxi, 030001, China.

<sup>b</sup>Laboratory of Chemical Biology, Changchun Institute of Applied Chemistry, Chinese Academy of Sciences, Changchun, Jilin, 130022, China.

<sup>c</sup>School of Applied Chemistry and Engineering, University of Science and Technology of China, Hefei, Anhui, 230026, China.

<sup>d</sup>Beijing National Laboratory for Molecular Sciences, Beijing, 100190, China

<sup>#</sup>These authors contributed equally

#### \* Corresponding authors

Dr. Yibo Wang, Email: [yibo.wang@ciac.ac.cn](mailto:yibo.wang@ciac.ac.cn); Dr. Xiaohui Wang, E-mail: [xiaohui.wang@ciac.ac.cn](mailto:xiaohui.wang@ciac.ac.cn)

**Table S1. MM/PBSA-derived binding free energies (kcal/mol) for protonated opioids binding to (TLR4/MD2)<sub>2</sub>**

|                     | $\Delta E_{\text{vdW}}$ | $\Delta E_{\text{cle}}$ | $\Delta G_{\text{sol-polar}}$ | $\Delta G_{\text{sol-nonpolar}}$ | $\Delta G_{\text{binding}}$ |
|---------------------|-------------------------|-------------------------|-------------------------------|----------------------------------|-----------------------------|
| protonated morphine | -33.9±0.3               | -48.6±0.5               | 51.8±0.4                      | 21.3±0.2                         | -9.4±0.3                    |
| protonated M3G      | -45.7±0.4               | -47.8±0.4               | 53.3±0.3                      | 28.9±0.2                         | -11.2±0.4                   |
| protonated M6G      | -41.2±0.7               | -65.9±0.5               | 64.1±0.4                      | 25.0±0.4                         | -17.9±0.5                   |

Numbers after ± present standard errors of mean

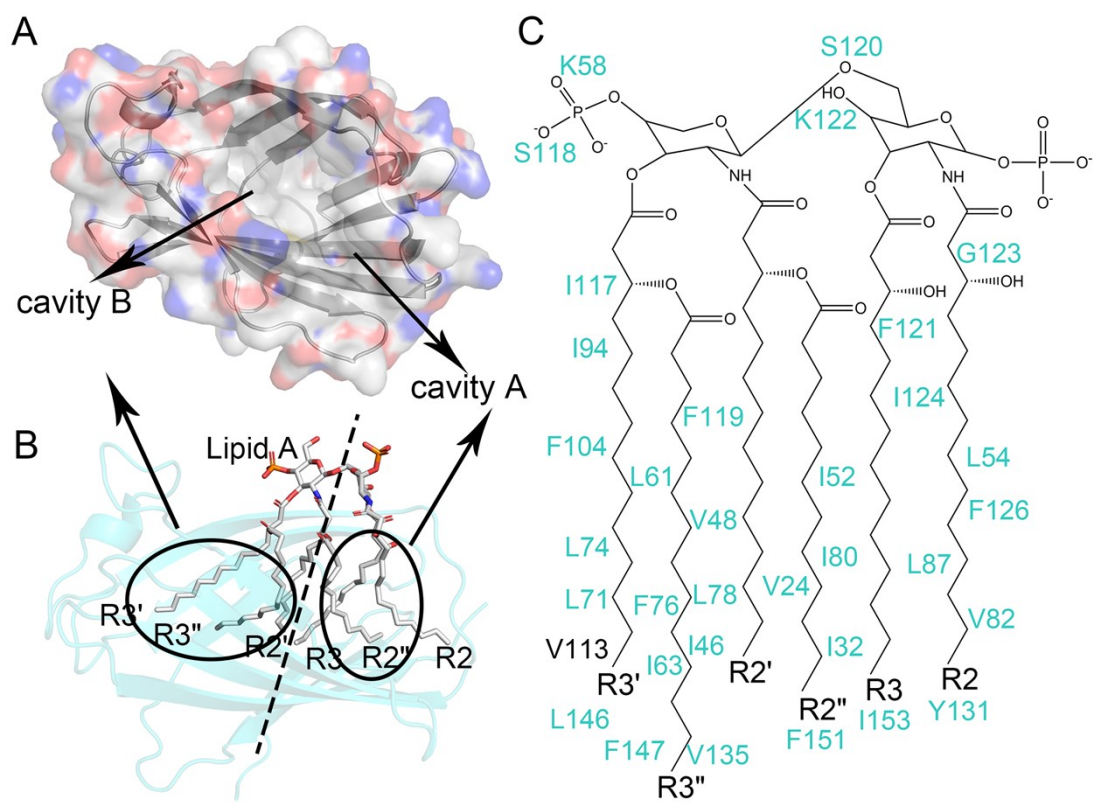

**Figure S1.** (A) The binding pocket of MD2 can be divided into cavity A and cavity B. (B) The lipid chains of lipid A interact with the hydrophobic pocket in MD2. (C) Chemical structure of the lipid A. MD2 residues involved in the interactions with the lipid chains were labeled.

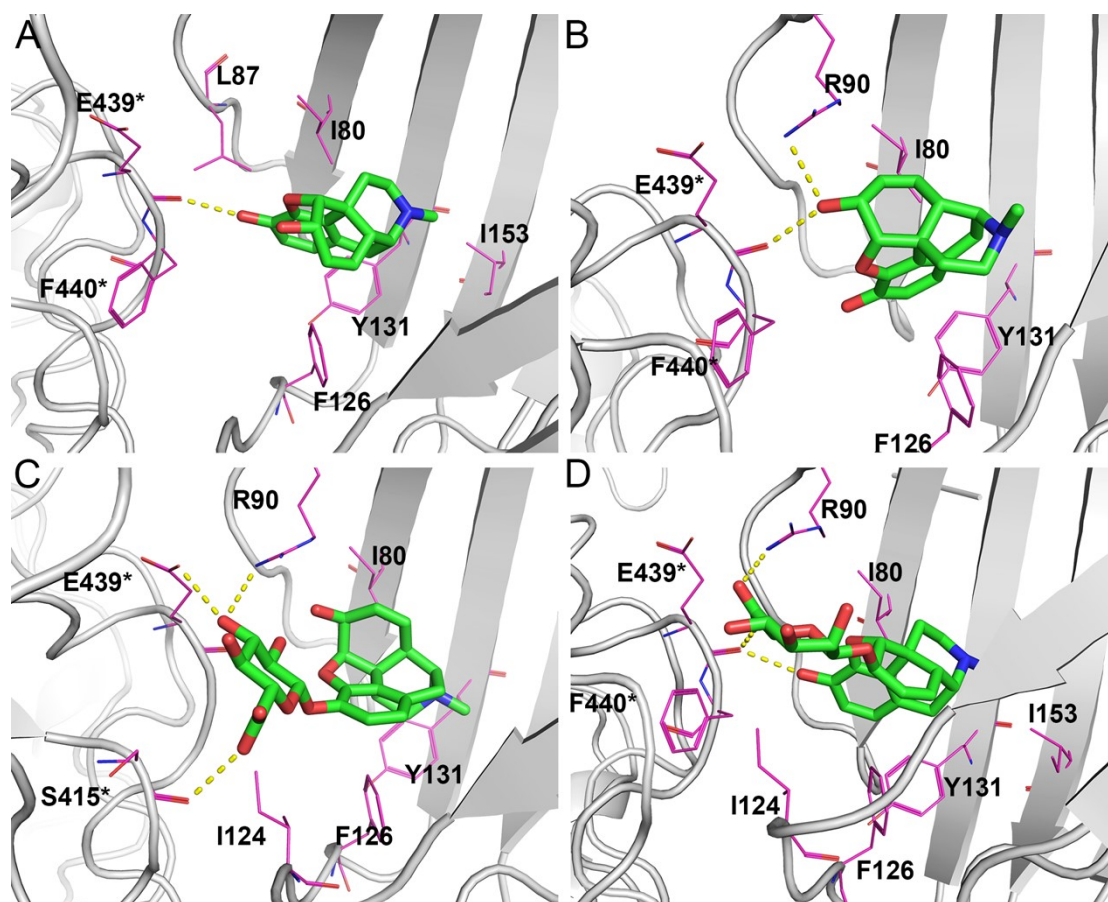

**Figure S2.** The key interactions corresponding to morphine (A), (+)-morphine (B), M3G (C), and M6G (D) docking with (TLR4/MD2)<sub>2</sub>.

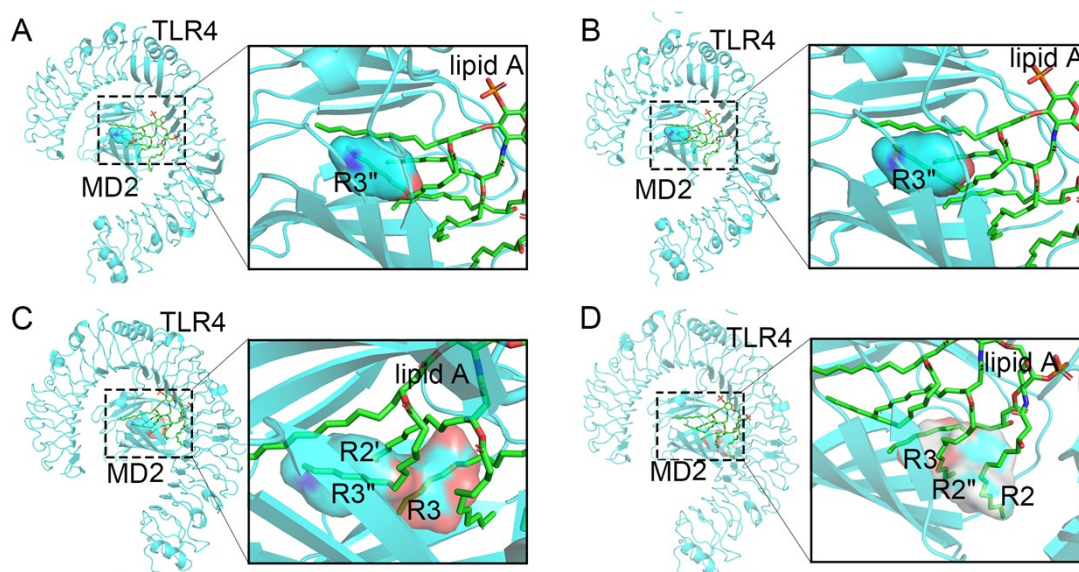

**Figure S3.** Overlap of the best docking pose of morphine and its metabolites with lipid A in the heterodimeric (TLR4/MD2)<sub>2</sub> systems. Morphine (A) and (+)-morphine (B) overlapped with the R3'' chain of lipid A; M3G (C) overlapped with the R2', R3, and R3'' chains of lipid A and occupied a large portion of MD2; M6G (D) overlapped with the R2, R2'', and R3 chains of lipid A. MD2 was shown as a cyan cartoon; lipid A was shown as a green stick model; ligands were shown as a magenta surface models.

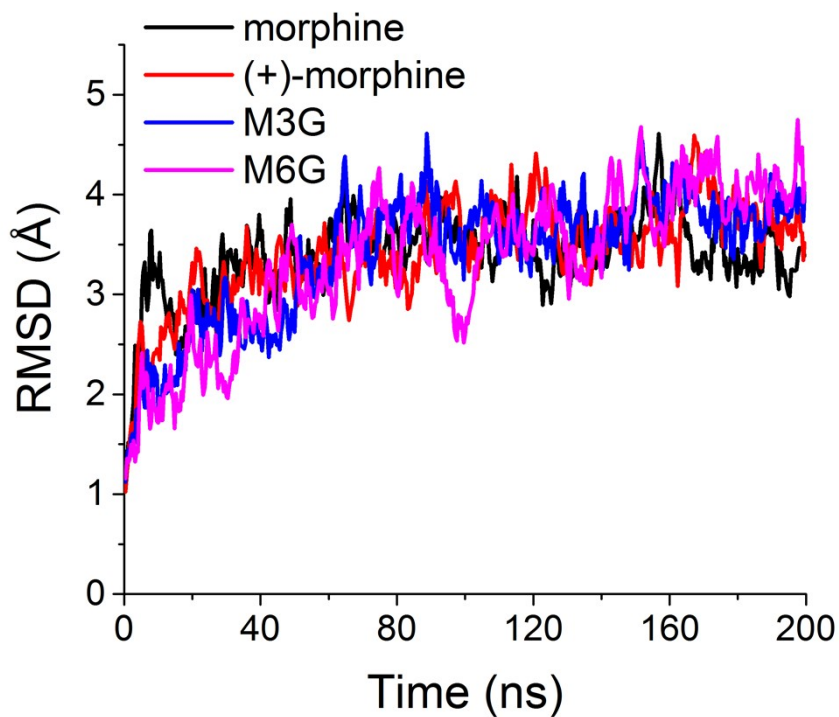

**Figure S4.** Time evolution of the (TLR4/MD2)<sub>2</sub> backbone RMSDs during molecular dynamics simulations. Black, red, blue, and magenta indicated (TLR4/MD2)<sub>2</sub> bound with morphine, (+)-morphine, M3G, and M6G, respectively.

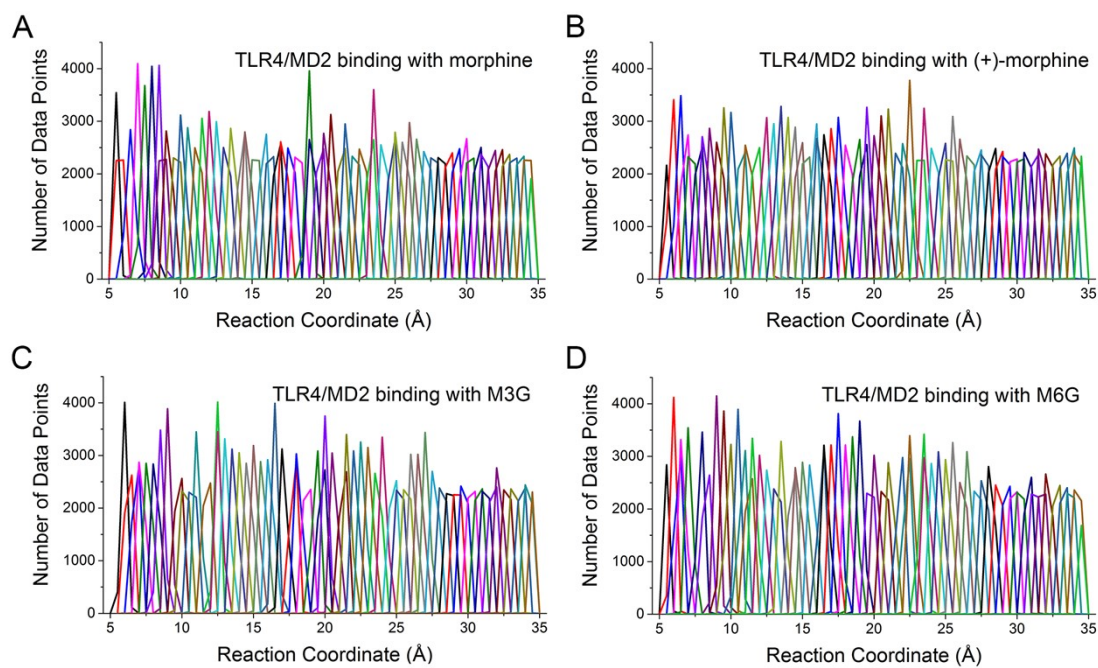

**Figure S5.** Histogram analysis of the overlap between umbrella windows along the reaction coordinate for (TLR4/MD2)<sub>2</sub> binding with morphine (A), (+)-morphine (B), M3G (C), and M6G. Each window consistently overlapped with its neighboring windows.

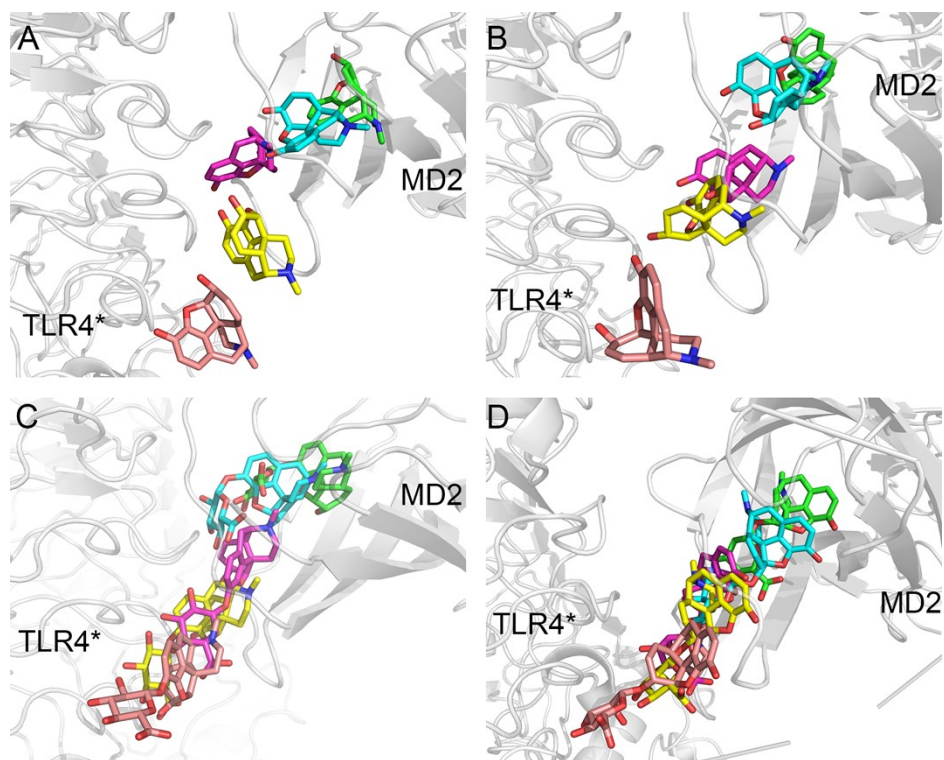

**Figure. S6.** Binding pathways of morphine (A), (+)-morphine (B), M3G (C), and M6G (salmon → yellow →magenta → cyan → green) with (TLR4/MD2)<sub>2</sub>.



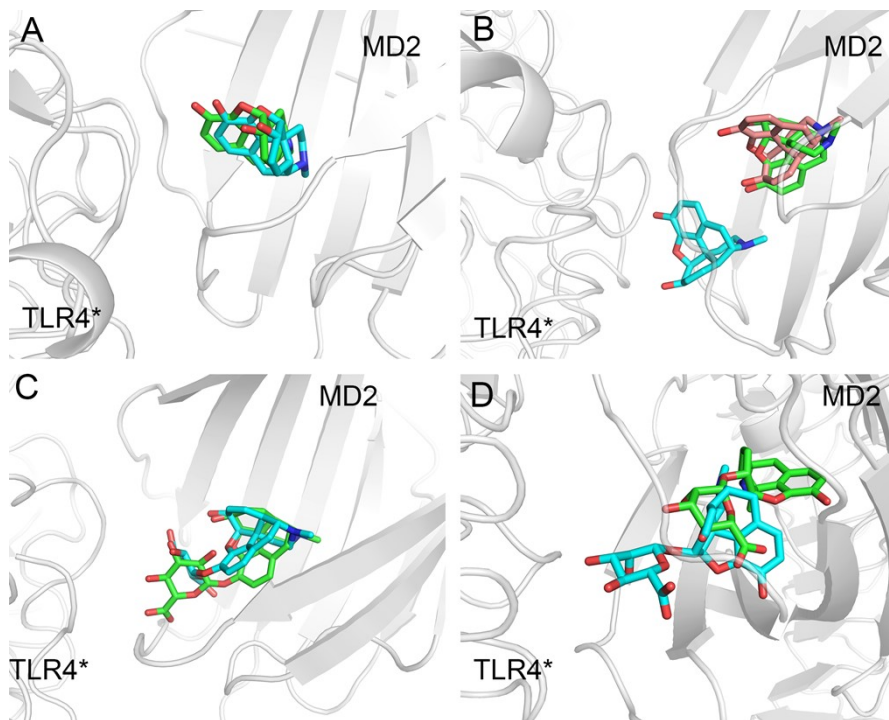

**Figure S7.** Alignment of conformations of morphine (A), (+)-morphine (B), M3G (C), and M6G (D) in the lowest free energy frame of molecular dynamics simulations (green), and the minima of PMFs (cyan). The intermediate conformation of (+)-morphine was shown as salmon stick.

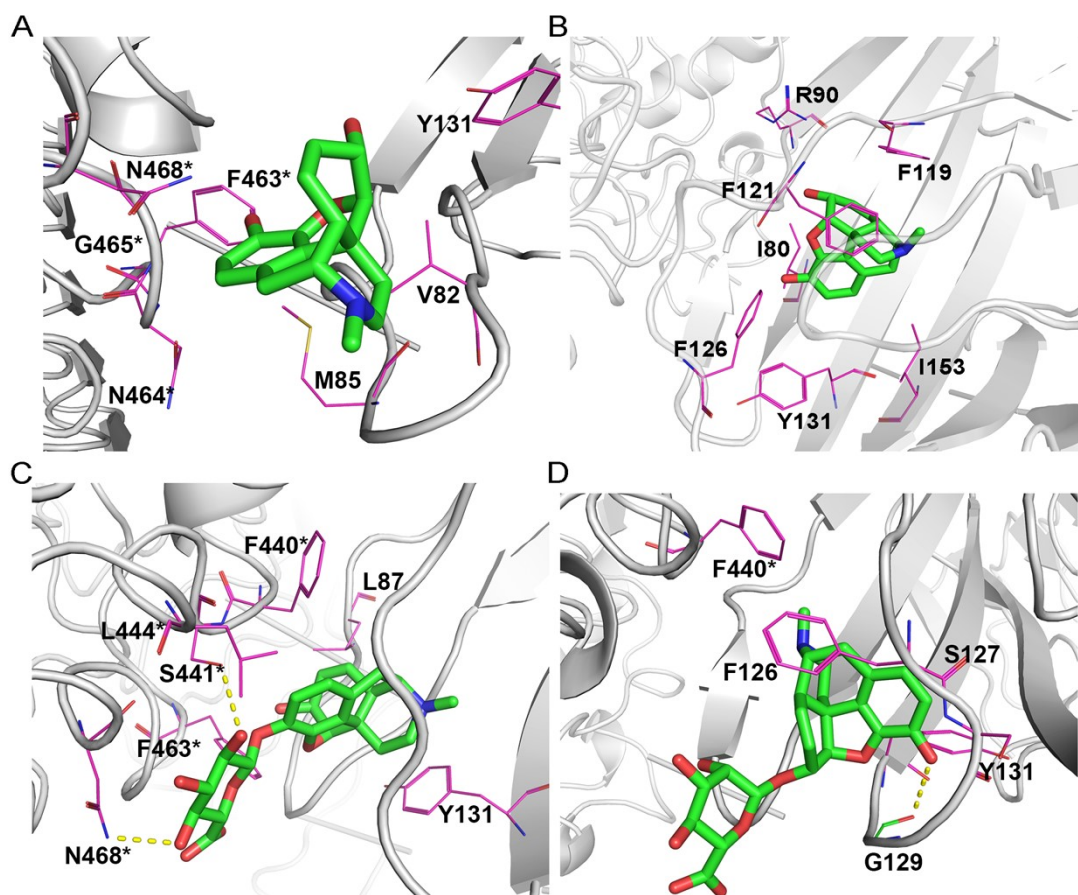

**Figure S8.** The intermediate states corresponding to morphine (A), (+)-morphine (B), M3G (C), and M6G (D) binding with  $(TLR4/MD2)_2$ . Ligands were shown as green stick models. TLR4\* and MD2 were shown as grey cartoons. The key residues in interacting with ligands during the binding process were shown as magenta sticks.
